# Supplementary material
Source: PubMed Central journal article supplement (PMC9124243)
Supplement: NIHMS1761030-supplement-1.pdf [file NIHMS1761030-supplement-1.pdf]

**Table S1. Primers used in this study.** Related to STAR METHODS.

| No. | Name                    | Sequence                                                                 |
|-----|-------------------------|--------------------------------------------------------------------------|
| 1   | Ecoli_dnaK_fow          | GAGGCTCACAGAGAACAGATTGGTGGGATGGGTAAAAT<br>AATTGGTATCG                    |
| 2   | Ecoli_dnaK_rev          | CTTTCGGGCTTTGTTAGCAGCCGGATCAGTTATTTTTTGT<br>CTTTGACTTCTTCAAATTC          |
| 3   | Ecoli_dnaJ_fow          | GAGGCTCACAGAGAACAGATTGGTGGGATGGCTAAGCA<br>AGATTATTACG                    |
| 4   | Ecoli_dnaJ_rev          | CTTTCGGGCTTTGTTAGCAGCCGGATCAGTTAGCGGG<br>TCAGGTCGTCAAAAACTTC             |
| 5   | Ecoli_grpE_fow2         | GAGGCTCACAGAGAACAGATTGGTGGGATGAGTAGTAAAGA<br>ACAGAAAACGCCTGAGGGGCAAG     |
| 6   | Ecoli_grpE_rev2         | CTTTCGGGCTTTGTTAGCAGCCGGATCAGTTAAGCTTTTGC<br>TTTCGCTACAGTAACCATCGCC      |
| 7   | pETS_Mtb_dnaK_NBD_fwd   | CCGGCGTCCTCAAGGGCGAGTGACTGATCCGGCTGCTAAC                                 |
| 8   | pETS_Mtb_dnaK_NBD_rev   | GTTAGCAGCCGGATCAGTCACTCGCCCTTGAGGACGCCGG                                 |
| 9   | pETS_Mtb_dnaK_SBD_fwd   | ACAGAGAACAGATTGGTGGGGTCAAAGACGTTCTGCTGCT                                 |
| 10  | pETS_Mtb_dnaK_SBD_rev   | AGCAGCAGAACGTCTTTCACCCCAACCAATCTGTTCTCTGT                                |
| 11  | Mtb_dnaK_R127A_fwd      | TTCAATGACGCCAGGCGCAGGCCACCAAGG                                           |
| 12  | Mtb_dnaK_R127A_rev      | CCTTGGTGGCCTGCGCCTGGGCGTCATTGAA                                          |
| 13  | Mtb_dnaK_E398A_fwd      | CCCACCAAGCGGTTCGGCCACTTTCACCAC                                           |
| 14  | Mtb_dnaK_E398A_rev      | GTGGTGAAAGTGGCCGACCGCTTGGTGGG<br>CCAAGCGGTTCGGAGACTGCCACCACCGCCGACGACAAC |
| 15  | Mtb_dnaK_F400A_fwd      | CAACC<br>GGTTGGTTGTCGTTCGGCGGTGGTGGCAGTCTCCGACCGCT                       |
| 16  | Mtb_dnaK_F400A_rev      | TGG<br>CCAAGCGGTTCGGAGACTTTCGCCACCAGCCGACGACAACCAA                       |
| 17  | Mtb_dnaK_T401A_fwd      | CC<br>GGTTGGTTGTCGTTCGGCGGTGGCGAAAGTCTCCGACCGCTT                         |
| 18  | Mtb_dnaK_T401A_rev      | GG                                                                       |
| 19  | Mtb_dnaK_D404A_fwd      | ACTTCACCACCGCCGCGGACAACCAACG                                             |
| 20  | Mtb_dnaK_D404A_rev      | CGTTGGTTGTCGGCGGCGGTGGTGAAGT                                             |
| 21  | Mtb_dnaK_N406A_fwd      | CGACGACGCCCAACCGTTCGGTGCAGATCCAGG                                        |
| 22  | Mtb_dnaK_N406A_rev      | CCTGGATCTGCACCGACGGTTGGGCGTTCGTCG                                        |
| 23  | Mtb_dnaK_E514A_fwd      | CGTAATCAAGCCGCCACATTGGTCTACCAG                                           |
| 24  | Mtb_dnaK_E514A_rev      | CTGGTAGACCAATGTGGCAGGCTTGATTACG<br>GAGGCTCACAGAGAACAGATTGGTGGGATGTCCAAGG |
| 25  | pETHisSUMO_Hsc70_fow    | GACCTGCAGTTGGTAT<br>CTTTCGGGCTTTGTTAGCAGCCGGATCAGTTAATCAACCT             |
| 26  | pETHisSUMO_Hsc70_rev    | CTTCAATGGTGGG<br>GAGGCTCACAGAGAACAGATTGGTGGGATGGCTAACGTGG                |
| 27  | pETHisSUMO_Hsdnaja2_fow | CTGACACGAAG                                                              |
| 28  | pETHisSUMO_Hsdnaja2_rev | CTTTCGGGCTTTGTTAGCAGCCGGATCAGTTACTGATGG<br>GCACACTGCACTC                 |

**Table S1. Primers used in this study, continued.** Related to STAR METHODS.

| No. | Name   | Sequence                 |
|-----|--------|--------------------------|
| 29  | oAF674 | GAATCTAGAATCGAGGAGTGGGTG |
| 30  | oAF675 | GTAGAATTCTCACTTGGCCTCCCG |

**Table S2. Plasmids used in this study.** Related to STAR METHODS.

| No. | Plasmid name            | Description                                                    | Source              |
|-----|-------------------------|----------------------------------------------------------------|---------------------|
| 1   | pETHisSUMO              | pET His6 Sumo TEV LIC cloning vector (Amp <sup>R</sup> )       | Addgene #29711      |
| 2   | pHYRS52                 | His6-S. cerevisiae ulp1 (res. 403-621) (Amp <sup>R</sup> )     | Addgene #31122      |
| 3   | pET-47b(+)              | N-terminal His6 (Kan <sup>R</sup> )                            | Novagen             |
| 4   | BMN146                  | pETHis6 SUMO Mtb DnaK R127A;                                   | This work           |
| 5   | SD9                     | pETHis6 SUMO DnaK parent, primers 11+12                        | Lupoli et al., 2016 |
| 6   | JTH100                  | pETHis6 SUMO Mtb DnaK T175A                                    | This work           |
| 7   | JTH126                  | pETHis6 SUMO Mtb DnaK NBD T175A (res. 1-359);                  | This work           |
| 8   | JTH265                  | pETHis6 SUMO DnaK T175A parent, primers 7+8                    | This work           |
| 9   | JTH266                  | pET His6 SUMO Mtb DnaK SBD (res. 360-625),                     | This work           |
| 10  | JTH267                  | pETHis6 SUMO DnaK parent, primers 9+10                         | This work           |
| 11  | JTH268                  | pETHis6 SUMO Mtb DnaK E398A;                                   | This work           |
| 12  | JTH269                  | pETHis6 SUMO DnaK parent, primers 13+14                        | This work           |
| 13  | JTH271                  | pETHis6 SUMO Mtb DnaK F400A;                                   | This work           |
| 14  | AR135                   | pETHis6 SUMO DnaK parent, primers 15+16                        | This work           |
| 15  | AR136                   | pETHis6 SUMO Mtb DnaK T401A;                                   | This work           |
| 16  | AR137                   | pETHis6 SUMO DnaK parent, primers 17+18                        | This work           |
| 17  | TL144                   | pETHis6 SUMO Mtb DnaK D404A;                                   | This work           |
| 18  | TL145                   | pETHis6 SUMO DnaK parent, primers 19+20                        | This work           |
| 19  | TL03                    | pETHis6 SUMO Mtb DnaK N406A;                                   | This work           |
| 20  | TL04                    | pETHis6 SUMO DnaK parent, primers 21+22                        | This work           |
| 21  | TL05                    | pETHis6 SUMO Mtb DnaK E514A;                                   | This work           |
| 22  | TL06                    | pETHis6 SUMO DnaK parent, primers 23+24                        | This work           |
| 23  | pcDNA5/FRT/TO HIS HSPA8 | pET His6 SUMO <i>E. coli</i> DnaK                              | This work           |
| 24  | pcDNA5/FRT/TO DNAJA2    | pET His6 SUMO, MG1655 template, primers 1+2                    | This work           |
| 25  | pAJF465                 | pET His6 SUMO <i>E. coli</i> DnaJ                              | This work           |
| 26  | pDB60                   | pET His6 SUMO, MG1655 template, primers 3+4                    | This work           |
|     |                         | pET His6 SUMO <i>E. coli</i> GrpE                              | This work           |
|     |                         | pET His6 SUMO, MG1655 template, primers 5+6                    | This work           |
|     |                         | pET His6 SUMO human Hsc73 (HspA8);                             | This work           |
|     |                         | pET His6 SUMO, plasmid 23 template, primers 25+26              | This work           |
|     |                         | pET His6 SUMO DnaJA2;                                          | This work           |
|     |                         | pET His6 SUMO, plasmid 24 template, primers 27+28              | This work           |
|     |                         | His6-SUMO-Mtb DnaJ1                                            | Lupoli et al., 2016 |
|     |                         | His6-SUMO-Mtb DnaJ2                                            | Lupoli et al., 2016 |
|     |                         | His6-SUMO-Mtb GrpE                                             | Lupoli et al., 2016 |
|     |                         | His6-SUMO-Mtb DnaK                                             | Lupoli et al., 2016 |
|     |                         | Human Hsc70 cloning vector                                     | Addgene #19541      |
|     |                         | Human DnaJA2 cloning vector                                    | Addgene #19465      |
|     |                         | <i>attB</i> ::Mtb <i>dnaK</i> (Strep <sup>R</sup> )*           | This work           |
|     |                         | Complementation vector (Strep <sup>R</sup> , <i>attP</i> (L5)) | Glickman lab        |

**Table S3. Strains used in this study.** Related to STAR METHODS.

| No. | Strain name                                    | Description                                                                                                      | Source               |
|-----|------------------------------------------------|------------------------------------------------------------------------------------------------------------------|----------------------|
| 1   | Rosetta2 (DE3)                                 | <i>E. coli</i> BL21 derivative for rare codon usage                                                              | Novagen              |
| 2   | Rosetta2 (DE3) pLysS                           | Rosetta2 expressing T7 lysozyme                                                                                  | Novagen              |
| 3   | EcTL03                                         | Rosetta2 expressing His6-SUMO-Mtb DnaJ1                                                                          | Lupoli et al., 2016  |
| 4   | EcTL04                                         | Rosetta2 expressing His6-SUMO-Mtb DnaJ2                                                                          | Lupoli et al., 2016  |
| 5   | EcTL05                                         | Rosetta2 expressing His6-SUMO-Mtb GrpE                                                                           | Lupoli et al., 2016  |
| 6   | EcTL06                                         | Rosetta2 expressing His6-SUMO-Mtb DnaK                                                                           | Lupoli et al., 2016  |
| 7   | His6 SUMO-Mtb DnaK NBD and full-length mutants | Rosetta2 transformed with a single plasmid (4-6)                                                                 | This work            |
| 8   | His6 SUMO-Mtb DnaK SBD and full-length mutants | Rosetta2(De3) pLysS transformed with a single plasmid (7-13)                                                     | This work            |
| 9   | His6 SUMO <i>E. coli</i> DnaK                  | Rosetta2 expressing His6-SUMO- <i>E. coli</i> DnaK                                                               | This work            |
| 10  | His6 SUMO <i>E. coli</i> DnaJ                  | Rosetta2 expressing His6-SUMO- <i>E. coli</i> DnaJ                                                               | This work            |
| 11  | His6 SUMO <i>E. coli</i> GrpE                  | Rosetta2 expressing His6-SUMO- <i>E. coli</i> GrpE                                                               | This work            |
| 12  | His6 SUMO Hsc73                                | Rosetta2 expressing His6-SUMO-Hsc73                                                                              | This work            |
| 13  | His6 SUMO DnaJA2                               | Rosetta2 pLys expressing His6-SUMO-DnaJA2                                                                        | This work            |
| 14  | mc <sup>2</sup> 155                            | <i>M. smegmatis</i> wild-type                                                                                    | Gift of Glickman lab |
| 15  | MGM6069                                        | <i>M. smegmatis</i> $\Delta$ <i>dnaj1 attB::strep</i> <sup>R</sup>                                               | Lupoli et al, 2016   |
| 16  | MGM6031                                        | <i>M. smegmatis</i> $\Delta$ <i>dnaj2::loxP</i>                                                                  | Lupoli et al, 2016   |
| 17  | MGM6003                                        | <i>M. smegmatis</i> $\Delta$ <i>dnaK attB::dnaK-mCitrine Kan</i> <sup>R</sup>                                    | Fay & Glickman, 2014 |
| 18  | MGM6933                                        | <i>M. smegmatis</i> $\Delta$ <i>dnaK attB::Mtb dnaK</i> (Strep <sup>R</sup> ) (MGM6003 transformed with pAJF465) | This work            |

**Table S4. Initial hits from “drug repurposing” library.\* Related to Figures 1 and S1.**

| Molecule ID | Structure                                                                           | initial IC <sub>50</sub> (μM) | Dose-Response Plot                                                                   | HPLC Purity (%) |
|-------------|-------------------------------------------------------------------------------------|-------------------------------|--------------------------------------------------------------------------------------|-----------------|
| RU-0423251  | Telaprevir (TP)                                                                     | 3.42                          | 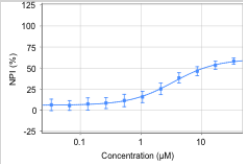   | 91.2            |
| RU-0187364  |    | 7.75                          |    | 100             |
| RU-0187363  |    | 7.41                          |    | 100             |
| RU-0162152  |   | 8.52                          |   | 95.3            |
| RU-0084237  |  | 11.4                          |  | 100             |
| RU-0084126  | 2Cl-B-MECA (MECA)                                                                   | 4.56                          |  | 98              |
| RU-0024306  |  | 6.07                          |  | 100             |
| RU-0000160  |  | 4.42                          |  | 90.4            |

\* Structure IDs, chemical structures, initial IC<sub>50</sub> values determined by plate-format ATPase assay; compound purity determined by HPLC. Note that RU-0000160 is the common dye crystal violet.



**Table S5. Initial hits from the “drug-like” library.\* Related to Figures 1 and S1.**

| Molecule ID | Structure | initial IC50 (μM) | Dose-Response Plot | HPLC Purity (%) |
|-------------|-----------|-------------------|--------------------|-----------------|
| RU-0278796  |           | 9.59              |                    | 100             |
| RU-0272931  |           | 11.4              |                    | 96.5            |
| RU-0415073  |           | 11.8              |                    | 100             |
| RU-0201380  |           | 13                |                    | 100             |
| RU-0272639  |           | 14.4              |                    | 100             |
| RU-0274435  |           | 17.1              |                    | 100             |
| RU-0272753  |           | 17.4              |                    | 96.5            |
| RU-0275942  |           | 20.1              |                    | 100             |
| RU-0277166  |           | 21.5              |                    | 100             |
| RU-0274544  |           | > 34.0            |                    | 97              |

\* Structure IDs, chemical structures, initial IC50 values determined by plate-format ATPase assay; compound purity determined by HPLC.

**Table S6. Summary of residues that were identified as sites of covalent modification by probe 7 in Mtb DnaK SBD after digestion followed by electrospray MS/MS. Related to Figures 5 and S5.**

| RESIDUE | CSMs <sup>A</sup> | CORRESPONDING PEPTIDE(S)                                                                |
|---------|-------------------|-----------------------------------------------------------------------------------------|
| L365    | 1                 | .VKDVLL[+530.284]LDVTPLSLGIETK.G                                                        |
| K395    | 2                 | R.NTTIPTK[+530.284]R.S                                                                  |
| E398    | 20                | R.SE[+530.284]TFTTADDNQPSVQIQVYQGER.E                                                   |
| T399    | 1                 | R.SET[+530.284]FTTADDNQPSVQIQVYQGER.E                                                   |
| A403    | 1                 | R.SETFTTA[+530.284]DDNQPSVQIQVYQGER.E                                                   |
| D405    | 7                 | R.SETFTTADD[+530.284]NQPSVQIQVYQGER.E                                                   |
| N406    | 25                | R.SETFTTADDN[+530.284]QPSVQIQVYQGER.E,<br>R.SETFTTADDN[+530.284]QPSVQIQ[+0.984]VYQGER.E |
| S409    | 2                 | K.RSETFTTADDNQPS[+530.284]VQIQVYQGER.E                                                  |
| Y415    | 1                 | K.RSETFTTADDNQPSVQIQVY[+530.284]QGER.E                                                  |
| H424    | 1                 | R.EIAAH[+530.284]NK.L                                                                   |
| N425    | 2                 | R.EIAAHN[+530.284]K.L                                                                   |
| S482    | 2                 | R.IQEGSGLS[+530.284]KEDIDR.M                                                            |
| E494    | 1                 | K.DAE[+530.284]AHAEEDR.K                                                                |
| H496    | 1                 | R.M[+15.995]IKDAEAH[+530.284]AEEDR.K                                                    |
| E499    | 1                 | K.DAEAHAE[+530.284]DR.K                                                                 |
| Y518    | 1                 | R.NQAETLVY[+530.284]QTEK.F                                                              |
| E538    | 3                 | R.EAEGGSKVPE[+530.284]DTLNKVDAAVAEAK.A                                                  |
| T540    | 4                 | R.EAEGGSKVPEDT[+530.284]LNKVDAAVAEAK.A                                                  |
| N542    | 1                 | R.EAEGGSKVPEDTLN[+530.284]KVDAAVAEAK.A                                                  |

<sup>a</sup> Color coding corresponds to residues shown in **Figure S5**.

**Table S7. MIC<sub>50</sub> values for indicated strains with aminoglycosides in the presence and absence of telaprevir (TP) in 1% total DMSO.<sup>a</sup> Related to Figures 7 and S7.**

| Strain                   | Streptomycin ( $\mu\text{g/mL}$ ) |                  | Kanamycin ( $\mu\text{g/mL}$ ) |                |
|--------------------------|-----------------------------------|------------------|--------------------------------|----------------|
|                          | + TP (100 $\mu\text{M}$ )         | DMSO             | + TP (100 $\mu\text{M}$ )      | DMSO           |
| Msm WT                   | 0.0216 (0.0135)                   | 0.0958 (0.0254)  | 0.193 (0.0435)                 | 0.337 (0.0759) |
| Msm $\Delta\text{dnaJ1}$ | N/A <sup>b</sup>                  | N/A <sup>c</sup> | N/A                            | 0.311 (0.0951) |
| Msm $\Delta\text{dnaJ2}$ | 0.0300 (.00819)                   | 0.0907 (0.0186)  | 0.268 (0.0521)                 | 0.356 (0.188)  |

<sup>a</sup> MIC<sub>50</sub> values are an average of three independent experiments performed in triplicate. Standard deviation (SD) of n=3 triplicate experiments shown in parentheses.

<sup>b</sup> N/A = not applicable. Growth of Msm  $\Delta\text{dnaJ1}$  cells is inhibited by 100  $\mu\text{M}$  TP as shown in **Figure S7F**.

<sup>c</sup> This strain is resistant to streptomycin and so an MIC<sub>50</sub> value was not determined.

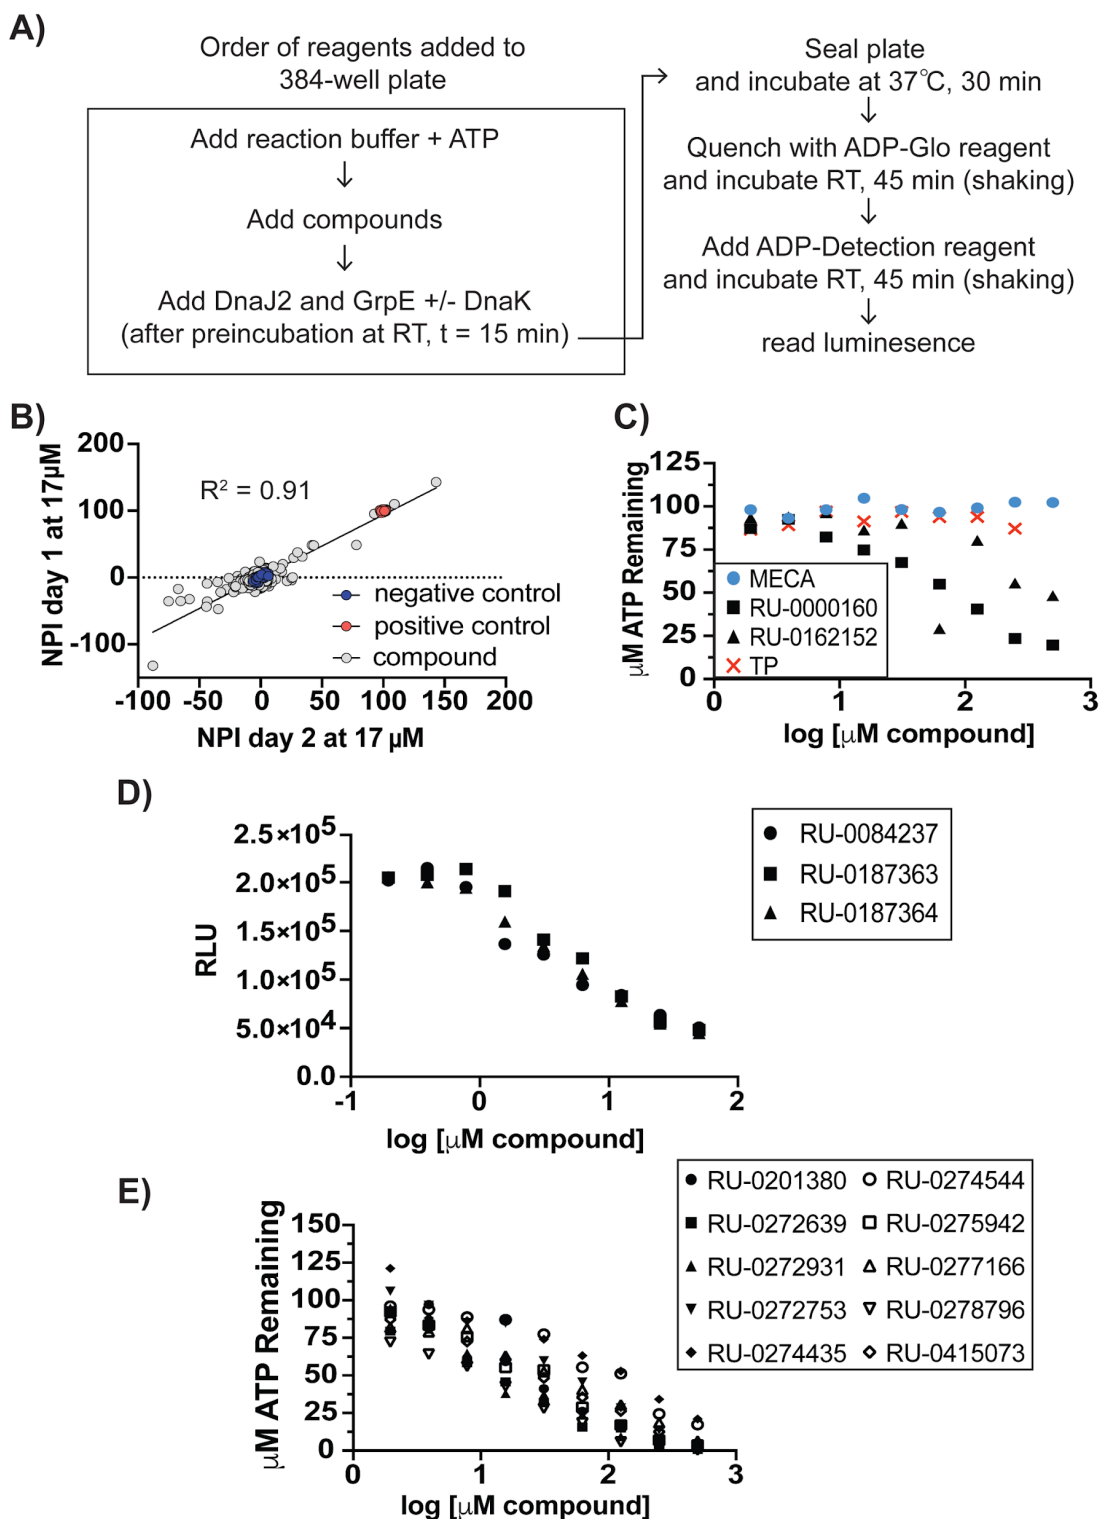

**Figure S1. Overview of high-throughput screen and assessment of hits for luciferase inhibition.** (A) Schematic of protocol for high-throughput screening approach entailing a coupled luciferase-dependent assay. See the Methods for a detailed description of the screen set-up. (B) Comparison of pilot library results over two consecutive days (NPI = normalized product inhibition) with a hit rate of 0.9%. (C) Luciferase activity in the presence of select “drug-repurposing” library hits including TP and MECA. TP and

MECA do not inhibit luciferase at indicated concentrations, while aromatic compounds RU-0000160 and RU-0162152 show inhibition. (D) Structurally similar compounds from the “drug repurposing” library all show similar inhibition profiles against luciferase. Higher RLU values correlate to higher ATP concentrations detected. (E) All ten compound hits from the “drug-like” library disrupt luciferase activity. For C-E, assay setup was performed as described for ATPase assays in the Methods, except DnaK and cofactors were not included in the reactions (t = 30 min). Note that RU-0024306 was not tested due to limited compound stock and because the scaffold is not ideal for targeted protein inhibition in cells. Related to **Figure 2** and **Tables S4** and **S5**.

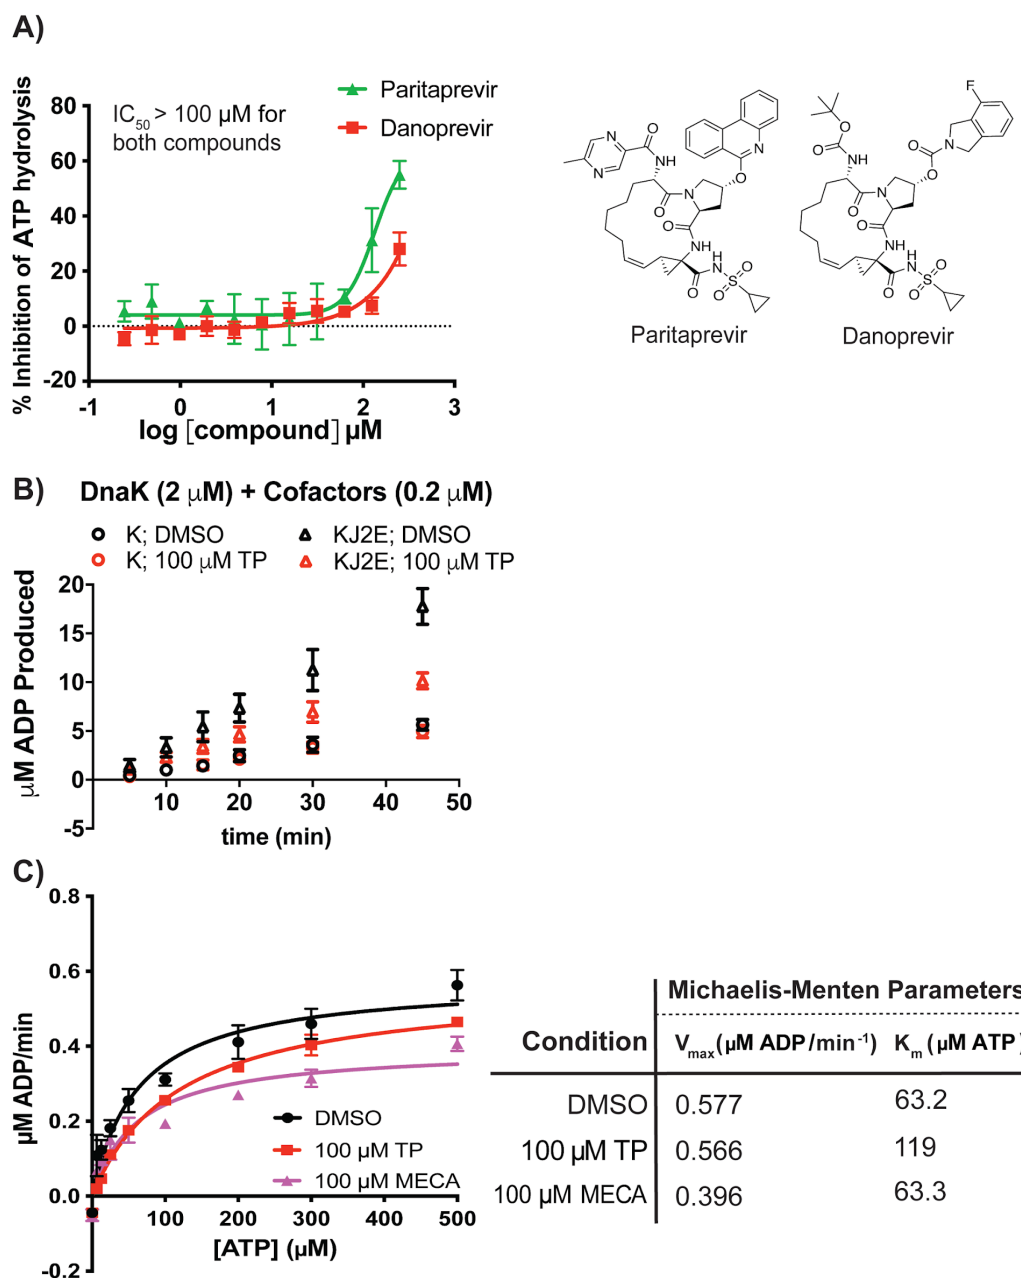

**Figure S2. ATPase assays indicate allosteric mechanisms of DnaK and cofactor inhibition by select small molecules.** (A) Dose-response assays indicate that additional HCV protease inhibitors (structures shown) are not potent Mtb DnaK ATPase inhibitors. Addition of varying concentrations of indicated compounds to Mtb DnaK-DnaJ2-GrpE shows inhibition only at high concentrations. IC<sub>50</sub> experiments were conducted using assay conditions described in the Methods section. (B) TP inhibits activation of DnaK by cofactor proteins. Time course of Mtb DnaK alone and with DnaJ2 and GrpE in the presence and absence of telaprevir (100  $\mu\text{M}$ ) shows disruption of DnaK ATPase activation by cofactors but not DnaK alone. (C) Michaelis-Menten kinetic analyses indicate that TP increases the  $K_m$  of the DnaK-DnaJ2-GrpE reaction, while MECA decreases the  $V_{\text{max}}$ . Mtb DnaK was first incubated with 100  $\mu\text{M}$  drug, then 0.2  $\mu\text{M}$  DnaJ2 and GrpE were added, followed by initiation with varying [ATP]. Reactions were quenched at 20 min. This data

suggests that TP affects binding of ATP in the NBD, while MECA does not (MECA acts as a non-competitive inhibitor). For all experiments,  $n = 3$ , and error bars indicate standard deviation (SD). Related to **Figure 2**.

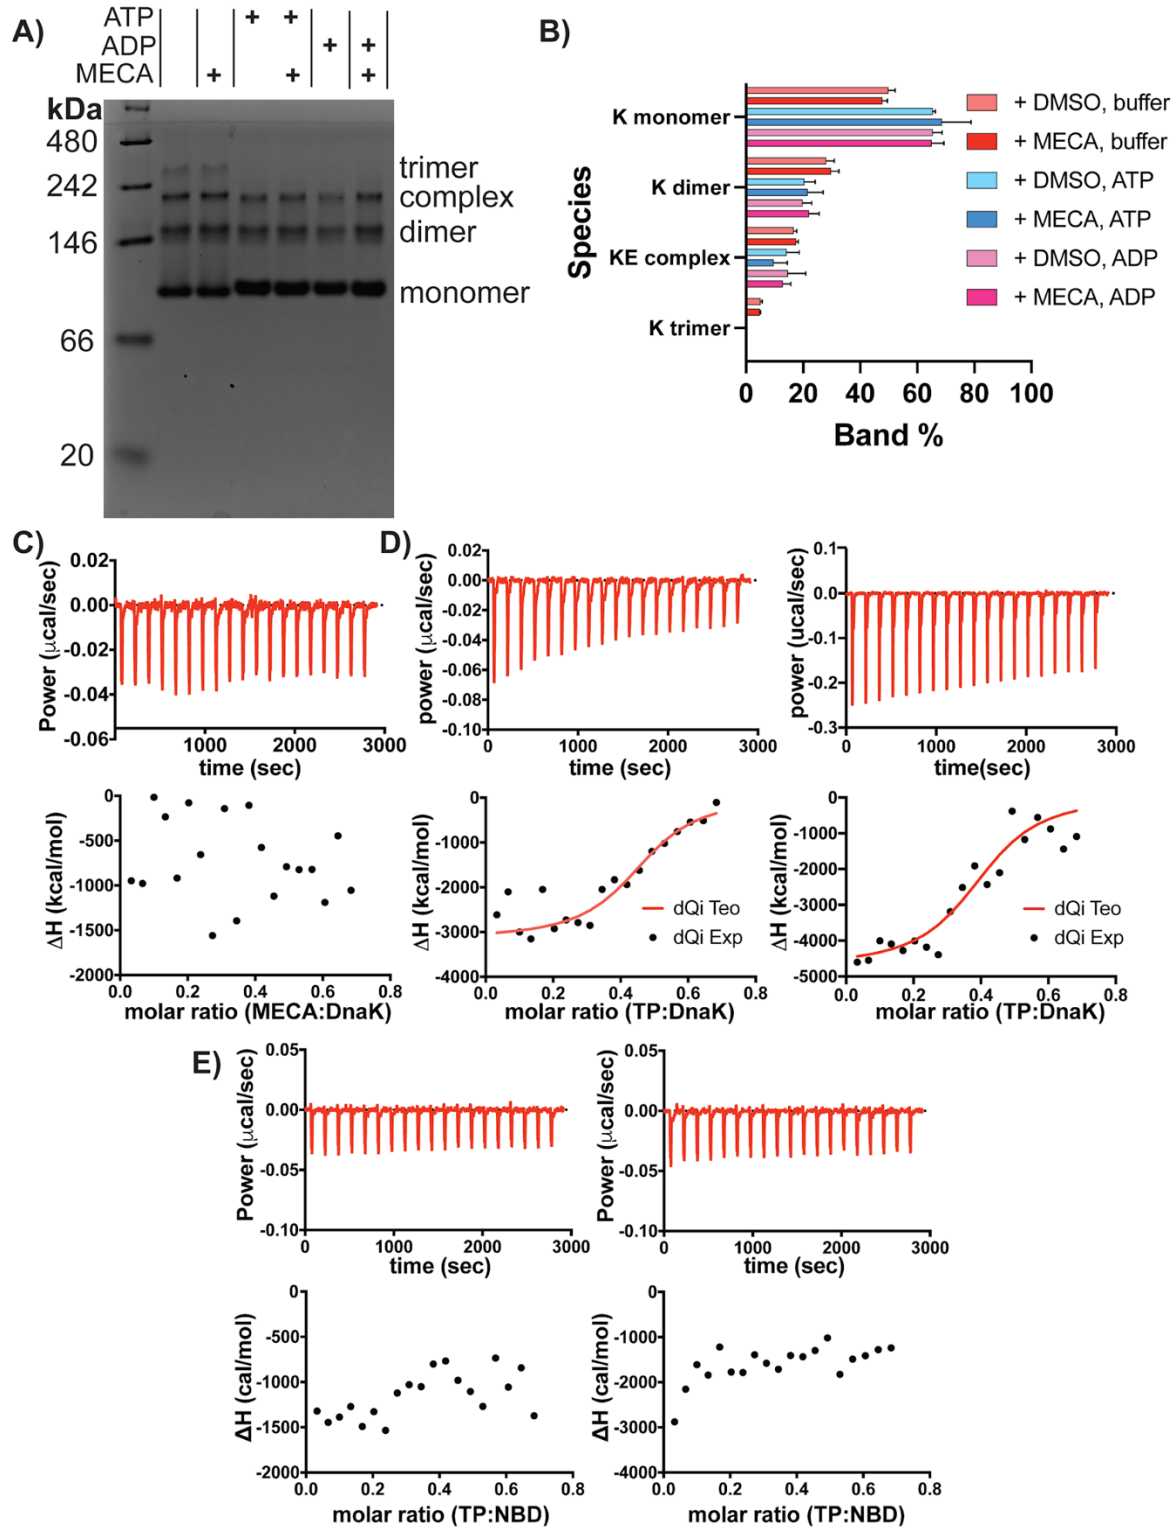

**Figure S3. Analyses of interactions between DnaK and small molecules indicates that TP binds directly to DnaK, while MECA does not.** (A) Native gel electrophoresis analysis of DnaK/GrpE complex formation in the presence and absence of nucleotides with and without MECA (100  $\mu$ M) added. (B) Quantification of the relative abundance of each band from replicate experiments of the gel shown in part A shows no significant difference in formation of any species upon addition of excess MECA ( $n = 3$ , error bars indicate SD). See Methods for detailed protocol. (C) ITC analysis of full-length apo DnaK T175A with MECA reveals a lack of binding to DnaK T175A alone. Replicate ITC experiments for TP binding in the presence of (D) full-length apo DnaK T175A and (E) the nucleotide binding domain (NBD) of apo DnaK T175A. TP binds to full-length DnaK, but not the NBD truncation. Related to **Figure 4**.



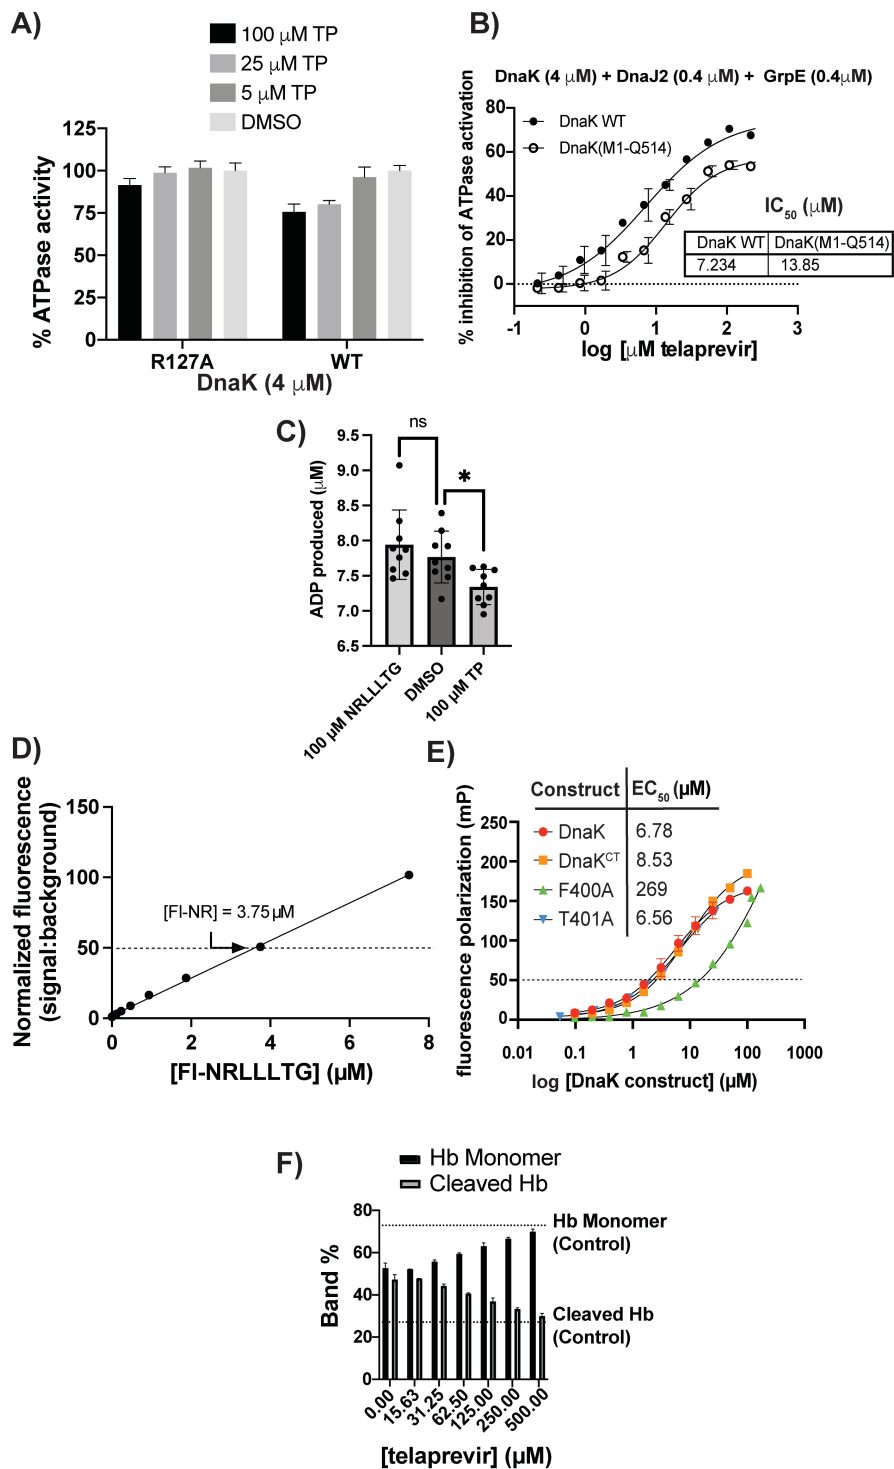

**Figure S4. TP binds to the beta-sandwich subdomain of the substrate binding domain (SBD) of DnaK.** (A) ATPase analysis of DnaK wild-type and R127A treated with decreasing concentrations of TP (t = 30 min). At high concentrations of TP, there is a small decrease in ATP turnover by WT DnaK but not

R127A, which is a mutation that disrupts allosteric communication between the NBD and SBD of DnaK. These data suggest that TP requires allosteric communication between the two domains to inhibit ATPase activity in the NBD. (n = 3, error bars indicate SD) (B) DnaK (M1-Q512) was titrated with TP and showed similar IC<sub>50</sub> values to wild-type under the same experimental conditions (t = 30 min), suggesting that the C-terminus of the alpha-helical domain is not required for inhibition. (n = 3, error bars indicate SD). (C) ADP produced by DnaK (4 μM) incubated with indicated concentrations of NRLLLTG or TP and compared to vehicle-only (DMSO) for t = 30 min (n = 9, error bars indicate SD). \*p < 0.05, unpaired t-test was used for comparison of indicated data points; ns: non-significant). For all ATPase assays, activity was assessed as described in Methods. Fluorescence polarization (FP) assay optimization was performed by carrying out the following experiments: (D) determination of [FL-NRLLLTG] at which fluorescence signal:noise exceeds 50 ([FL-NR] = 3.75 μM) and (E) determination of a [DnaK] at which fluorescence polarization signal exceeds 100 mP (Rossi and Taylor, 2011; Moerke, 2009). Selected concentrations were then used for displacement assays with other compounds. Representative singleton experiments are shown. F) Digestion of the model substrate hemoglobin (Hb) with proteinase K in the presence of increasing concentrations of TP after quantification of band intensities following SDS-PAGE analysis. The dashed lines indicate percentages of Hb monomer and proteolysis products when no proteinase K was added (control). Note that 50 μM TP is not anticipated to inhibit proteinase K cleavage activity. Related to **Figure 4**.

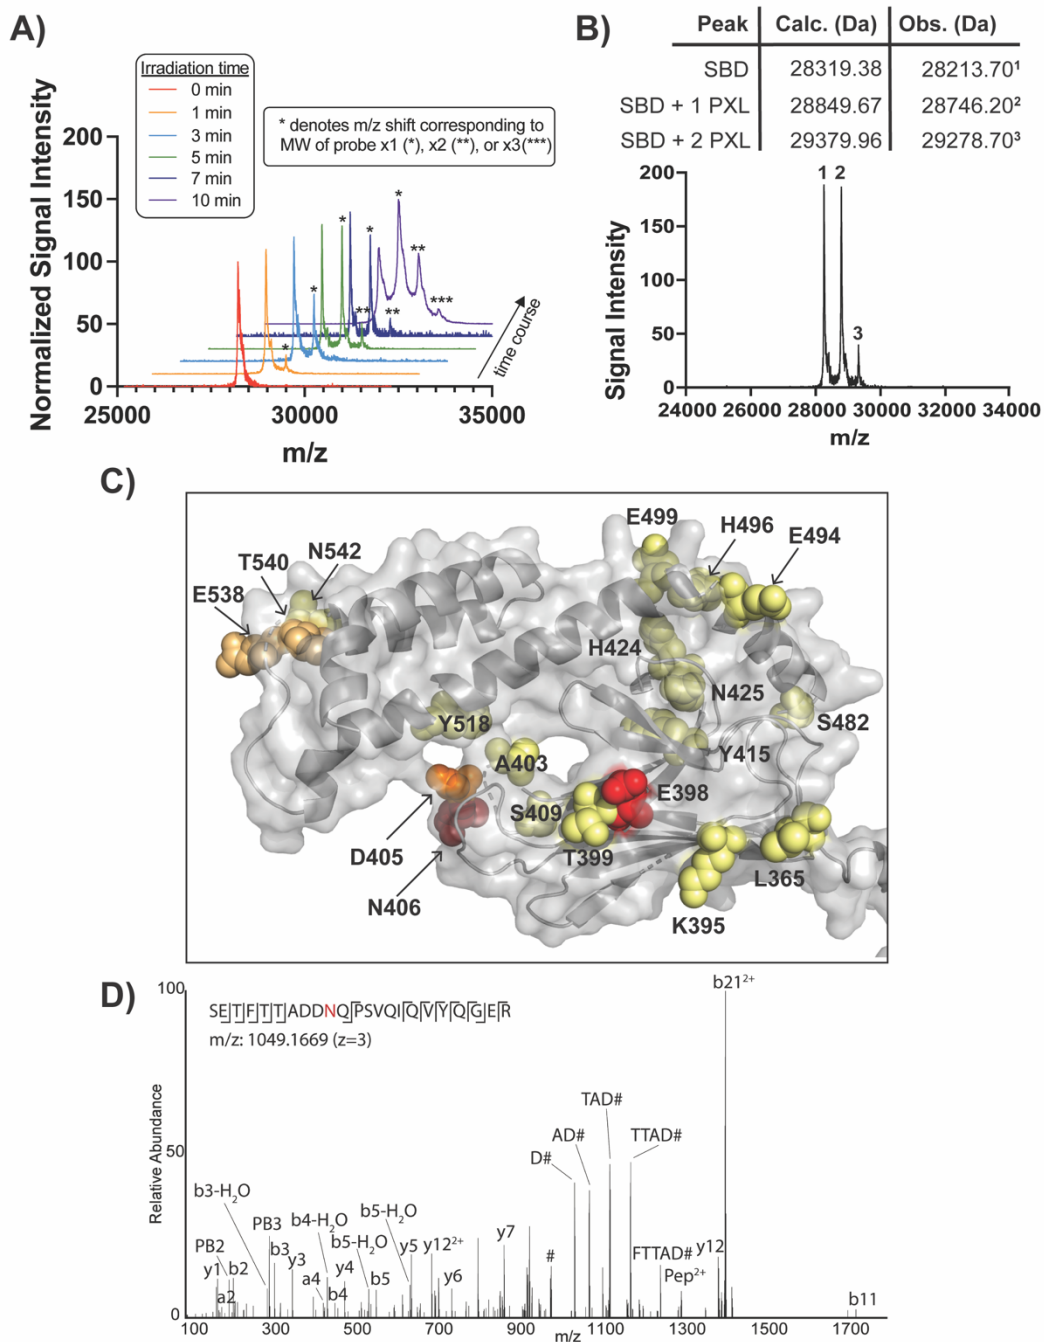

**Figure S5. Photo-crosslinking optimization and mass spectrometry (MS) analyses demonstrate crosslinking of 7 to the peptide binding subdomain of the SBD.** (A) A time course experiment was conducted to find the optimal time point for crosslinking of 7 to DnaK. Each MALDI-TOF trace indicates a different irradiation time and the number of molecules of peptide 7 that is crosslinked to DnaK is indicated. (B) Covalent modification at  $t = 5$  min, at which time an approximately 50:50 signal of the single modified (+532.5001 Da adduct) and unmodified protein can be detected, with minimal non-specific crosslinking product resulting from crosslinks to two 7 peptides (+1065.001 peak). The expected mass increase for covalent modification is 530.285 Da; although the accuracy of the available MALDI-TOF for intact proteins is poor, it could still be used to assess relative quantities of crosslinked species (PXL = photo-crosslink).

(C) Visual representation of residues that were identified as sites of covalent modification by probe 7 in Mtb DnaK SBD by digestion followed by electrospray MS/MS. Color coding corresponds to the number of crosslink spectral matches (CSMs) at each residue, as detailed in **Table S6**. (D) Shown here is the Higher-Energy Collision Dissociation (HCD) MS/MS spectrum ( $(M + 3H)^{+3}$  ions) of SETFTTADDNQPSVQIQVYQGER (one of the most highly modified peptides) acquired on an Orbitrap Eclipse Tribrid with 30,000 resolution (@ 400  $m/z$ ). N-terminal fragment ions (b-type ions) are indicated by ] and C-terminal fragment ions (y-type ions) are indicated by [. Doubly charged ions are indicated with 2+. The red character indicates the likely placement of the probe modification within the sequence. PB2 and PB3 indicate fragment ions of the probe 206.093 and 305.161 Da respectively. # indicates the internal fragment ion containing peptide DNQPSVQIQVYQG and N-terminal additional amino acids as indicated (e.g. D# is DDNQPSVQIQVYQG). Related to **Figure 5, Table S6**.

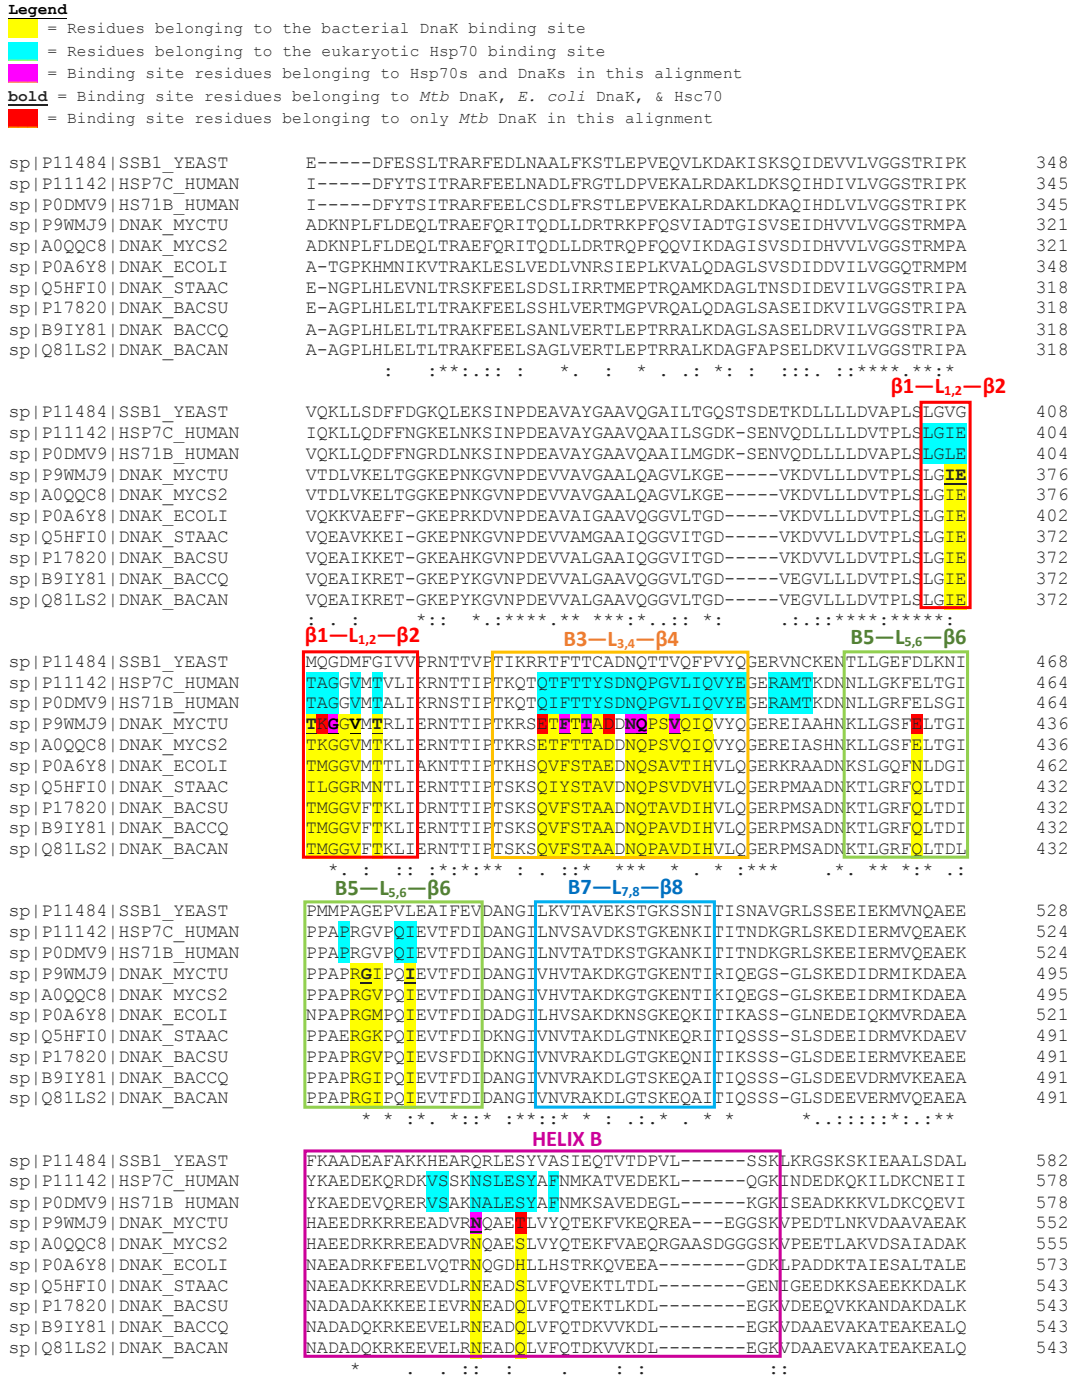

**Figure S6. Alignment of substrate binding domains of DnaKs and Hsp70s with important residues in peptide binding domain highlighted.** Alignment of SBDs of Hsp70 family members from humans, yeast and multiple prokaryotes (DnaKs). Secondary structure-based labeling was obtained from previous work on *E. coli* DnaK (Zhu *et al.*, 1996). Peptide binding site residues were highlighted for human (blue) and prokaryotes (yellow) (Chiappori *et al.*, 2015). Refer to key for color-coding of important residues. Alignment was performed using Clustal Omega. Related to **Figure 6**.

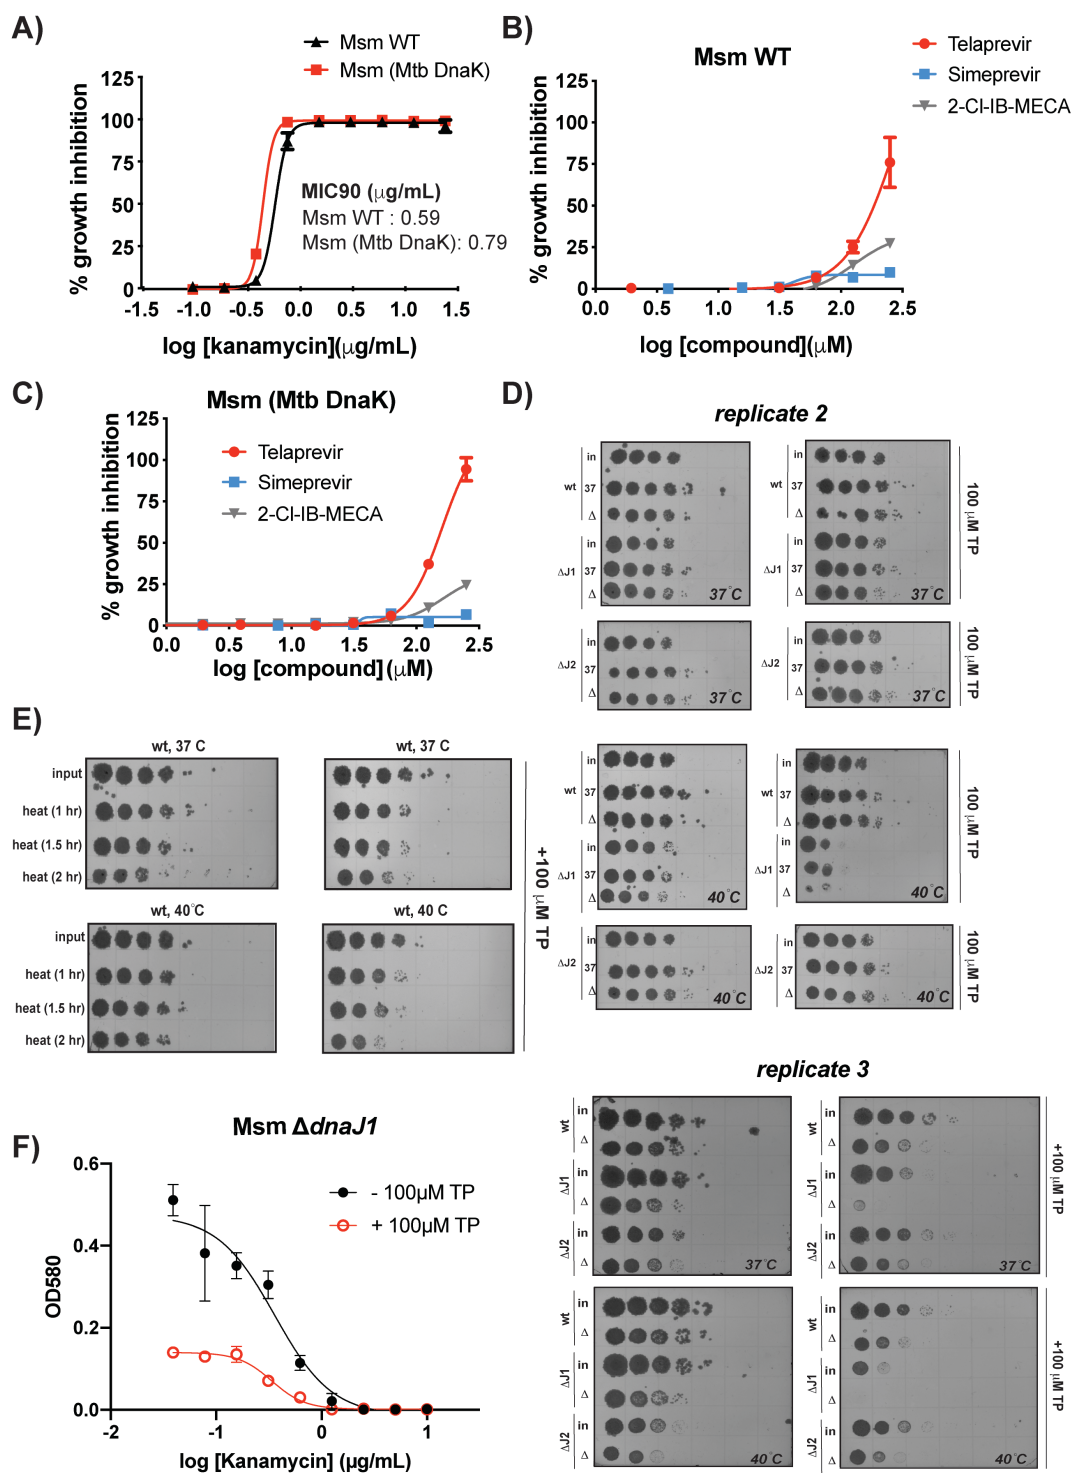

**Figure S7. Cell-based assays using *Mycobacterium smegmatis* (Msm) indicate high concentrations of TP inhibit recovery after cells are exposed to prolonged heat stress.** (A) Both Msm wild-type and MGM6933 (Msm  $\Delta dnaK$  expressing Mtb *dnaK*) cells show similar minimum inhibitory concentrations for 90% growth inhibition (MIC90s) with the known antibiotic kanamycin. Msm DnaK shares approximately 89% sequence identity with its homolog in Mtb. (B) Msm wild-type shows sensitivity to telaprevir only at

concentrations >100  $\mu\text{M}$ ; similar concentrations of simeprevir and 2-Cl-IB-MECA do not affect growth. (C) MGM6933 cells behave similar to Msm wild-type in part B in the presence of indicated compounds. For dose response experiments, plates were read at  $t = 2$  days, and growth was compared to wells containing vehicle only. (D) Replicates for heat shock assay shown in **Figure 7A**. Recovery of indicated Msm strains following heat shock (53  $^{\circ}\text{C}$ , 1 hour) prior to growth +/- TP at 37  $^{\circ}\text{C}$  or 40  $^{\circ}\text{C}$  indicates that cells lacking *dnaJ1* are the most sensitive to TP following global protein denaturation. Cell dilution factor increases from left to right across each plate. Wt: Msm;  $\Delta J1$ : Msm  $\Delta dnaJ1$ ;  $\Delta J2$ : Msm  $\Delta dnaJ2$ ;  $\Delta$ : heat; in: input. Note that in *replicate 2*, the rows labeled "37" indicate samples incubated at 37  $^{\circ}\text{C}$  for 1 hr instead of undergoing heat shock. (E) Heat shock of Msm wild-type cells over indicated time course shows that cells become sensitive to TP after prolonged heat treatment. As described in the Methods section, cells were incubated at 53  $^{\circ}\text{C}$  for time indicated (heat) prior to dilution and plating on 7H10 plates with and without TP, and incubation at 37 or 40  $^{\circ}\text{C}$ . Compared to the input, cells that are heat shocked for 2 hr and incubated at elevated temperature show about a 2- $\log_{10}$  growth recovery defect with TP added; cells incubated without TP do not show the same extent of growth recovery defect, even when grown at elevated temperatures. Cell dilution factor increases from left to right across each plate. (F) Growth of Msm  $\Delta dnaJ1$  over a range of kanamycin concentrations in the presence and absence of TP shows that 100  $\mu\text{M}$  TP inhibits cell growth. Optical density at 580 nm (OD580) shown on day = 3. Related to **Figure 7** and **Table S7**.
